# Supplementary material
Source: PubMed Central journal article supplement (PMC454191)

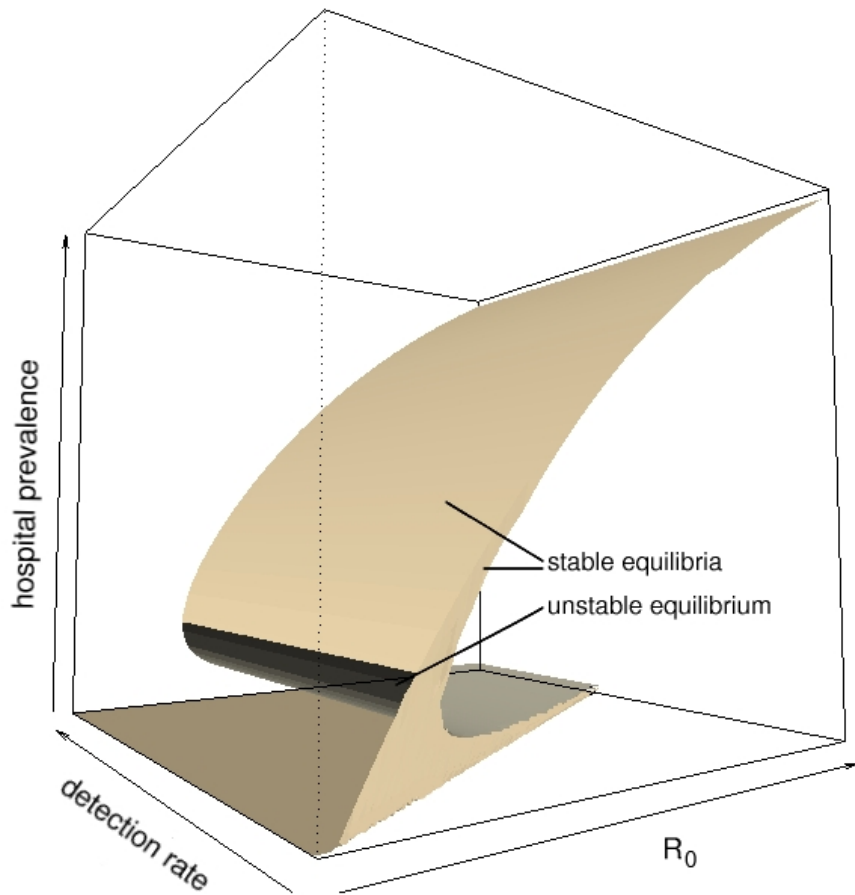

Supplement: pnas_101_27_10223__1.pdf [file pnas_101_27_10223__1.pdf]
